# Supplementary material for: Optical performance improvement of semi-transparent metal film electrodes with biomimetic subwavelength gratings for high-performance optoelectronic device applications
Source: Royal Society of Chemistry journal article supplement (doi:10.1039/c5ra14282b), 2015-01-01
Supplement: c5ra14282b1.pdf [file c5ra14282b1.pdf]

# Optical performance improvement of semi-transparent metal film electrodes with biomimetic subwavelength gratings for high-performance optoelectronic device applications

Minkyu Choi, Jung Woo Leem and Jae Su Yu\*

Department of Electronics and Radio Engineering, Institute for Wearable Convergence Electronics, Kyung Hee University, 1732 Deogyong-daero, Giheung-gu, Yongin-si 17104, South Korea

\*Authors to whom correspondence should be addressed:

[jsyu@khu.ac.kr](mailto:jsyu@khu.ac.kr) (J. S. Yu)

## Supplementary Information

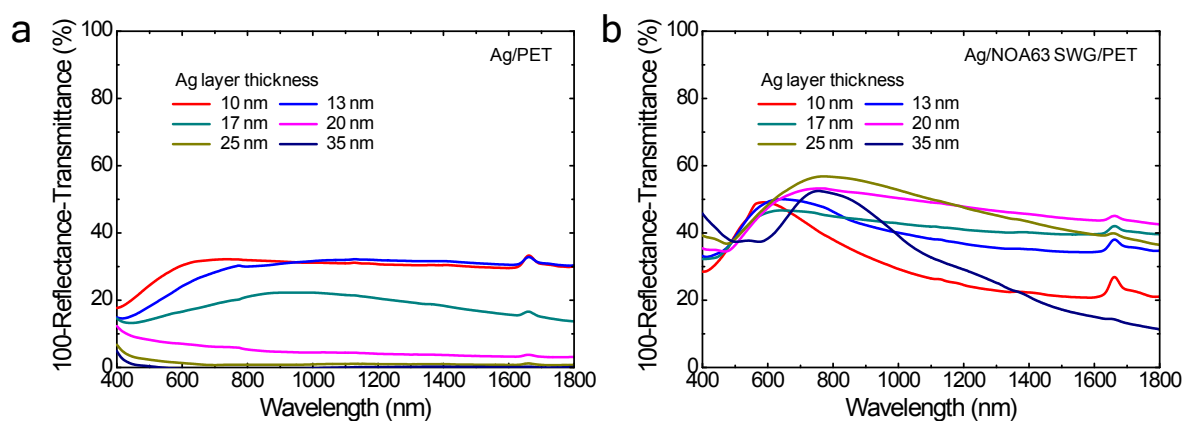

Fig. S1 Absorption (100-reflectance-transmittance) spectra of the Ag/PET and the Ag/NOA63 SWG/PET for different Ag layer thicknesses.

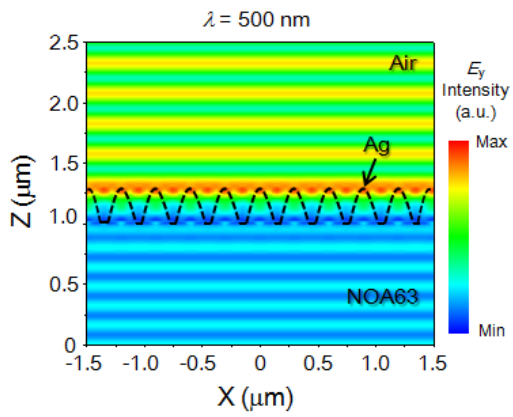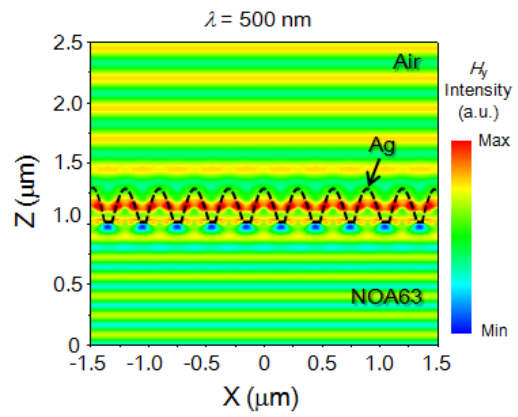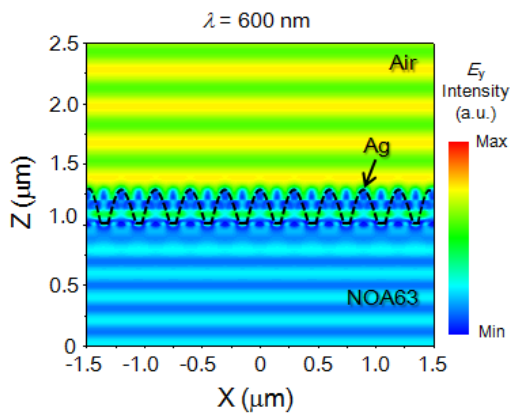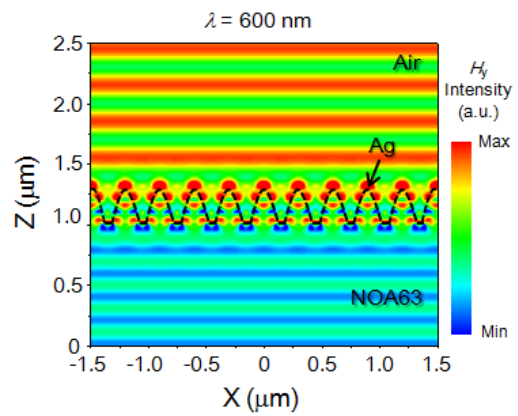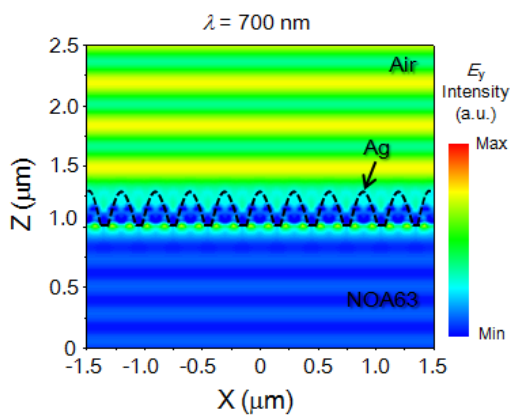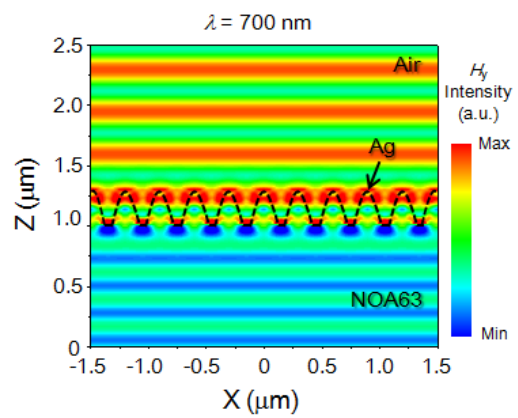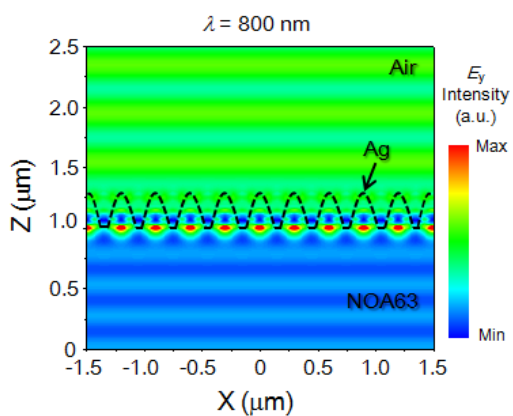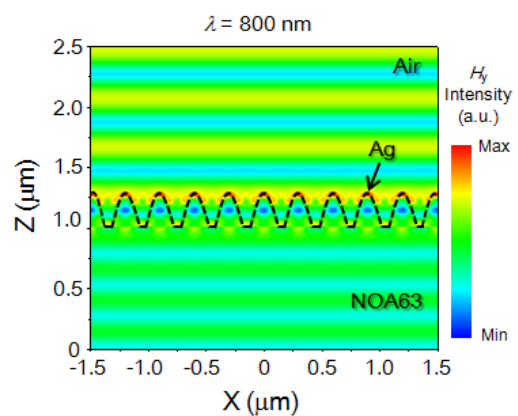

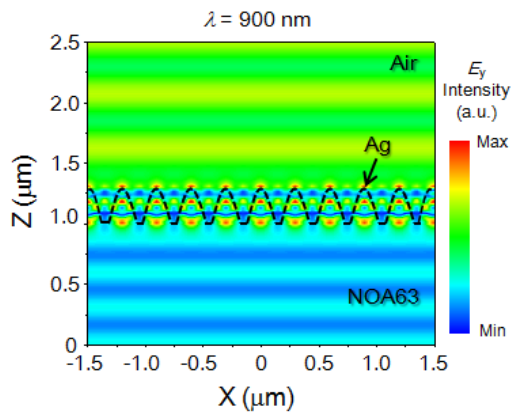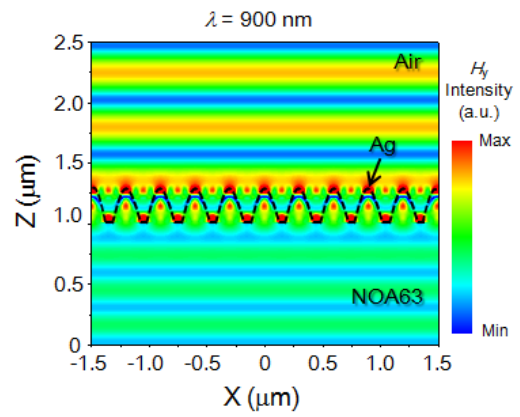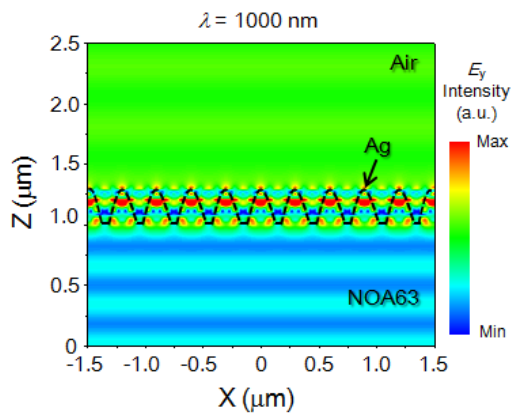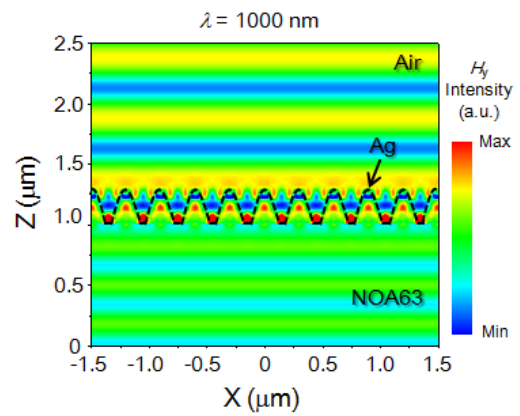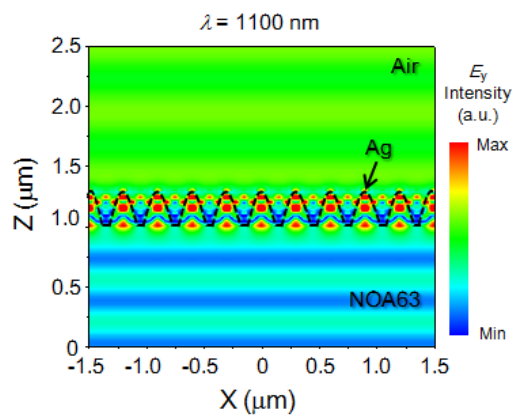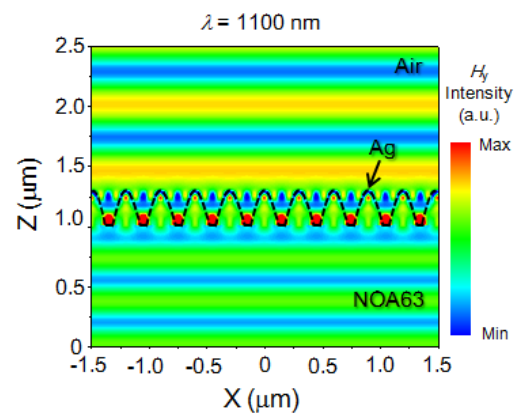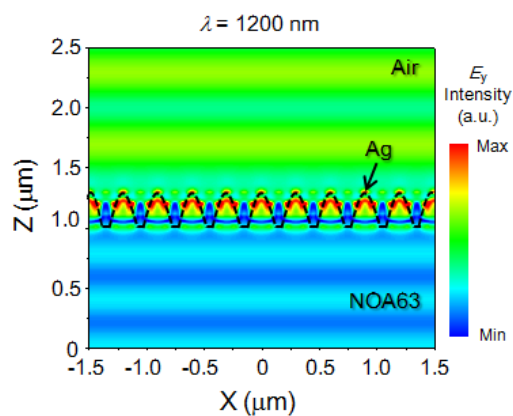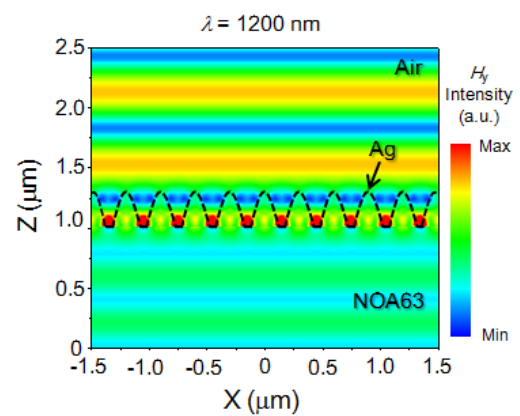

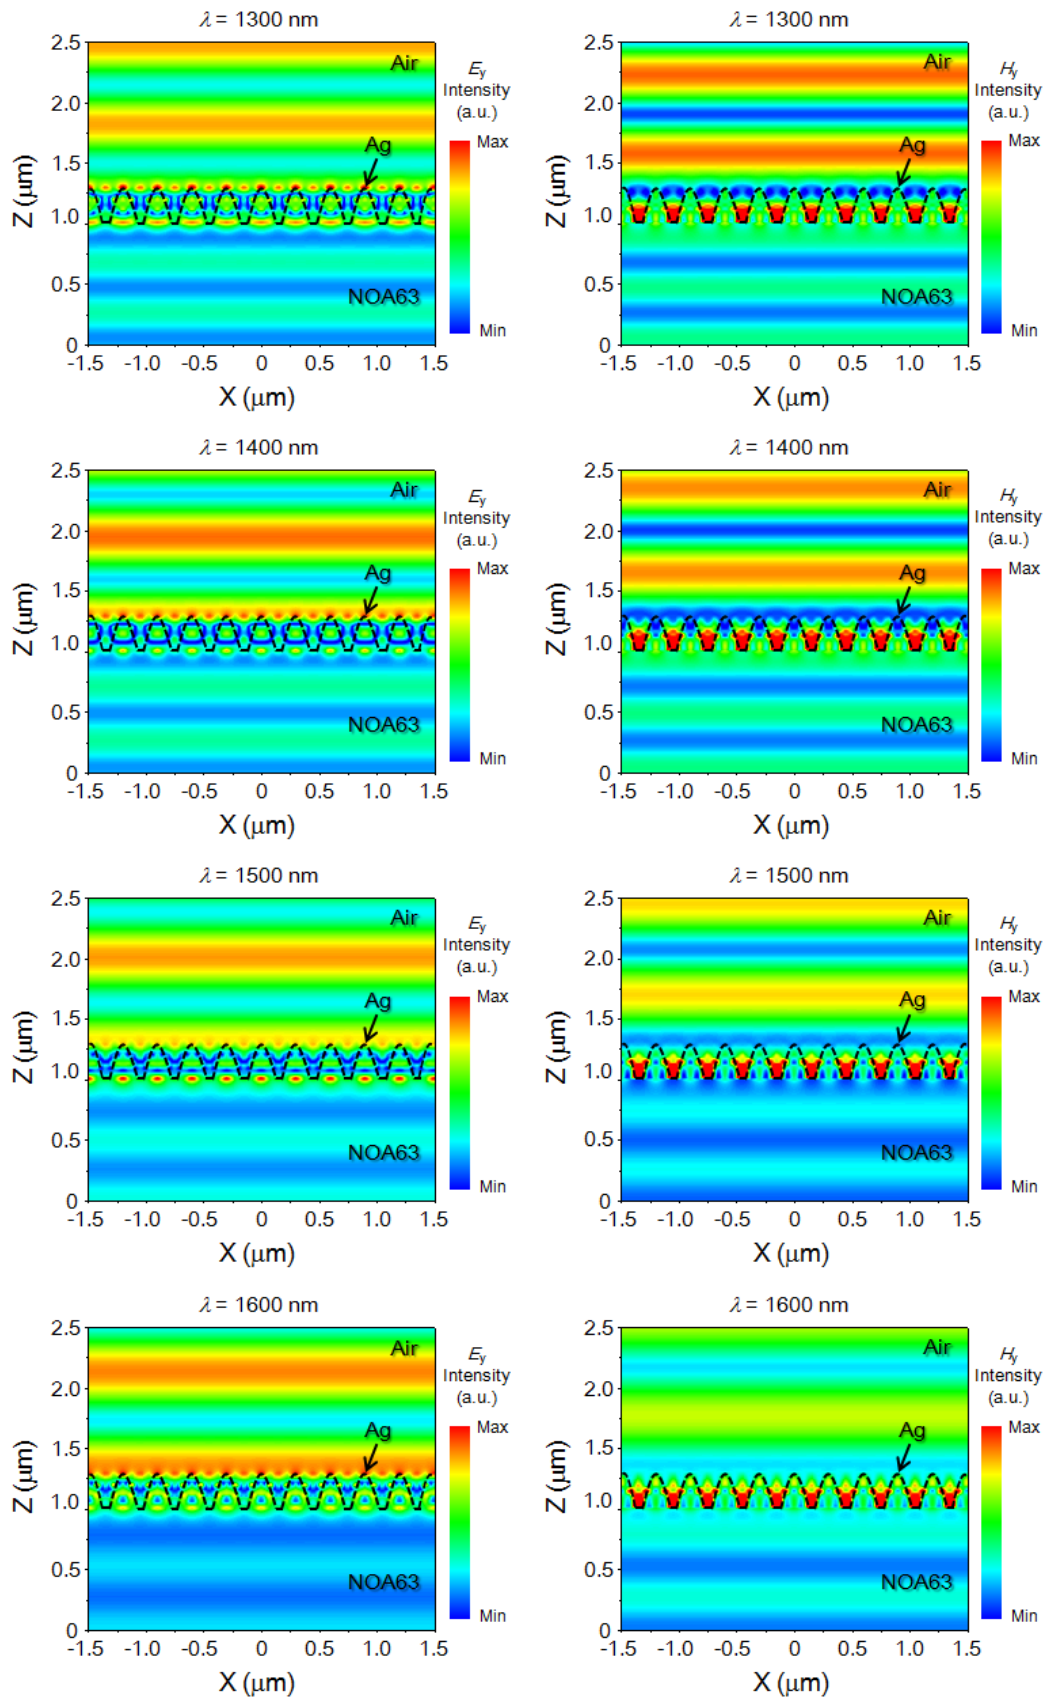

**Fig. S2** Calculated electric ( $E_y$ ) and magnetic ( $H_y$ ) field intensity distributions of Ag (17 nm)-coated NOA63 SWGs at different wavelengths.
